# Supplementary material for: Barrier heights, reaction energies and bond dissociation energies for RH + HO2reactions with coupled-cluster theory, density functional theory and diffusion quantum Monte Carlo methods
Source: Royal Society of Chemistry journal article supplement (doi:10.1039/d2cp04463c), 2022-11-15
Supplement: d2cp04463c1.pdf [file d2cp04463c1.pdf]

### Contents

1. Cartesian coordinates of reactants, products and transition states for the RH+HO<sub>2</sub> systems at the B3LYP/def2-TZVP level of theory.
2. Single point energies, correlation energies of reactants, products and transition states for the RH+HO<sub>2</sub> reactions with different methods.
3. Deviations of the barrier heights, reaction energies and X-H bond energies for DFA-D3(BJ) with respect to the CCSD(T)-F12b/CBS values and differences between barrier heights of R1-R8 reactions by those dispersion-corrected and dispersion-uncorrected DFAs. .

1. Cartesian coordinates of reactants, products and transition states for the RH+HO<sub>2</sub> systems at the B3LYP/def2-TZVP level of theory.

HO<sub>2</sub>

|   |             |             |            |
|---|-------------|-------------|------------|
| O | 0.05542200  | -0.60836200 | 0.00000000 |
| O | 0.05542200  | 0.71727200  | 0.00000000 |
| H | -0.88675600 | -0.87127600 | 0.00000000 |

H<sub>2</sub>O<sub>2</sub>

|   |             |             |            |
|---|-------------|-------------|------------|
| O | 0.00000000  | 0.73056900  | 0.00000000 |
| H | 0.95492300  | 0.88063300  | 0.00000000 |
| O | 0.00000000  | -0.73056900 | 0.00000000 |
| H | -0.95492300 | -0.88063300 | 0.00000000 |

CH<sub>3</sub>

|   |             |             |            |
|---|-------------|-------------|------------|
| C | 0.00000000  | 0.00000000  | 0.00000000 |
| H | 0.00000000  | 1.07912500  | 0.00000000 |
| H | 0.93455000  | -0.53956300 | 0.00000000 |
| H | -0.93455000 | -0.53956300 | 0.00000000 |

CH<sub>4</sub>

|   |             |             |             |
|---|-------------|-------------|-------------|
| C | 0.00000000  | 0.00000000  | 0.00000000  |
| H | 0.62874000  | 0.62874000  | 0.62874000  |
| H | -0.62874000 | -0.62874000 | 0.62874000  |
| H | -0.62874000 | 0.62874000  | -0.62874000 |
| H | 0.62874000  | -0.62874000 | -0.62874000 |

C<sub>2</sub>H<sub>5</sub>

|   |             |             |             |
|---|-------------|-------------|-------------|
| C | -0.69163500 | 0.00001000  | -0.00204500 |
| H | -1.09076600 | -0.00151000 | 1.02425800  |
| H | -1.10397600 | -0.88466200 | -0.49329600 |
| H | -1.10402100 | 0.88607600  | -0.49067500 |
| C | 0.79175600  | 0.00000100  | -0.01801300 |
| H | 1.34904600  | -0.92486100 | 0.04007400  |
| H | 1.34898900  | 0.92489200  | 0.03998800  |

C<sub>2</sub>H<sub>6</sub>

|   |             |             |             |
|---|-------------|-------------|-------------|
| C | 0.00000000  | 0.00000000  | 0.76346800  |
| H | 0.00000000  | 1.01722900  | 1.16103000  |
| H | -0.88094600 | -0.50861500 | 1.16103000  |
| H | 0.88094600  | -0.50861500 | 1.16103000  |
| C | 0.00000000  | 0.00000000  | -0.76346800 |
| H | -0.88094600 | 0.50861500  | -1.16103000 |

|   |            |             |             |
|---|------------|-------------|-------------|
| H | 0.88094600 | 0.50861500  | -1.16103000 |
| H | 0.00000000 | -1.01722900 | -1.16103000 |

n-C<sub>3</sub>H<sub>7</sub>

|   |             |             |             |
|---|-------------|-------------|-------------|
| C | 1.30139600  | -0.29350800 | -0.02677700 |
| H | 1.27712000  | -1.33082400 | 0.28182600  |
| H | 2.26386500  | 0.13795200  | -0.26680700 |
| C | 0.08128500  | 0.55060800  | 0.04527700  |
| H | 0.08610600  | 1.13092800  | 0.98319500  |
| H | 0.10785400  | 1.30733500  | -0.74749700 |
| C | -1.22552000 | -0.24138500 | -0.03383300 |
| H | -1.28489600 | -0.97720100 | 0.77162300  |
| H | -2.09241800 | 0.41644800  | 0.05086200  |
| H | -1.30060000 | -0.77892700 | -0.98120500 |

n-C<sub>3</sub>H<sub>8</sub>

|   |             |             |             |
|---|-------------|-------------|-------------|
| C | 0.00000000  | 1.27398600  | -0.25895800 |
| H | -0.88159200 | 1.31880400  | -0.90393200 |
| H | 0.00000000  | 2.16941300  | 0.36633400  |
| H | 0.88159200  | 1.31880400  | -0.90393200 |
| C | 0.00000000  | 0.00000000  | 0.58422800  |
| H | -0.87434300 | 0.00000000  | 1.24259000  |
| H | 0.87434300  | 0.00000000  | 1.24259000  |
| C | 0.00000000  | -1.27398600 | -0.25895800 |
| H | 0.88159200  | -1.31880400 | -0.90393200 |
| H | 0.00000000  | -2.16941300 | 0.36633400  |
| H | -0.88159200 | -1.31880400 | -0.90393200 |

i-C<sub>3</sub>H<sub>7</sub>

|   |             |             |             |
|---|-------------|-------------|-------------|
| C | -0.00942900 | 0.53431200  | 0.00000000  |
| H | 0.18960800  | 1.59881200  | 0.00000000  |
| C | -0.00942900 | -0.19700800 | 1.29397300  |
| H | 0.95223000  | -0.70093700 | 1.48235200  |
| H | -0.19241600 | 0.46704500  | 2.14008800  |
| H | -0.76975900 | -0.98640300 | 1.31023000  |
| C | -0.00942900 | -0.19700800 | -1.29397300 |
| H | -0.19241600 | 0.46704500  | -2.14008800 |
| H | 0.95223000  | -0.70093700 | -1.48235200 |
| H | -0.76975900 | -0.98640300 | -1.31023000 |

p-C<sub>4</sub>H<sub>9</sub>

|   |            |             |             |
|---|------------|-------------|-------------|
| C | 1.88592200 | -0.13295500 | 0.01605400  |
| H | 2.03026600 | -0.84346000 | -0.80188400 |
| H | 2.68268800 | 0.61060900  | -0.04740600 |

|   |             |             |             |
|---|-------------|-------------|-------------|
| H | 2.01564000  | -0.67938300 | 0.95374000  |
| C | 0.50802800  | 0.52049900  | -0.05674600 |
| H | 0.41682500  | 1.08742900  | -0.98806700 |
| H | 0.40300600  | 1.24782100  | 0.75489700  |
| C | -0.64329400 | -0.48689400 | 0.02819400  |
| H | -0.52428300 | -1.07419200 | 0.95531100  |
| H | -0.54905500 | -1.22411500 | -0.77901600 |
| C | -1.99380300 | 0.12994200  | -0.00763800 |
| H | -2.14706500 | 1.14959800  | 0.32192500  |
| H | -2.86914200 | -0.45785900 | -0.24868900 |

s-C<sub>4</sub>H<sub>9</sub>

|   |             |             |             |
|---|-------------|-------------|-------------|
| C | -1.93509600 | 0.16701200  | -0.06272500 |
| H | -2.01848400 | 0.69984900  | -1.01223800 |
| H | -2.74268000 | -0.56575100 | -0.01583500 |
| H | -2.09550800 | 0.89094300  | 0.73964100  |
| C | -0.56771500 | -0.50379500 | 0.07091300  |
| H | -0.44571700 | -1.25865000 | -0.71786000 |
| H | -0.54331000 | -1.08201600 | 1.01085200  |
| C | 0.57983300  | 0.44335600  | 0.03250000  |
| H | 0.39808800  | 1.48601800  | 0.26851100  |
| C | 1.98201300  | -0.04248500 | -0.05182200 |
| H | 2.09941800  | -0.80297700 | -0.83212800 |
| H | 2.68343900  | 0.76689500  | -0.25995300 |
| H | 2.31053500  | -0.51883800 | 0.88580800  |

p-C<sub>4</sub>H<sub>10</sub>

|   |             |             |             |
|---|-------------|-------------|-------------|
| C | 0.70168000  | 1.83100600  | 0.00000000  |
| H | 0.18948500  | 2.22523800  | 0.88160800  |
| H | 1.71762800  | 2.23153500  | 0.00000000  |
| H | 0.18948500  | 2.22523800  | -0.88160800 |
| C | 0.70168000  | 0.30347700  | 0.00000000  |
| H | 1.25065500  | -0.06187800 | 0.87486700  |
| H | 1.25065500  | -0.06187800 | -0.87486700 |
| C | -0.70168000 | -0.30347700 | 0.00000000  |
| H | -1.25065500 | 0.06187800  | -0.87486700 |
| H | -1.25065500 | 0.06187800  | 0.87486700  |
| C | -0.70168000 | -1.83100600 | 0.00000000  |
| H | -0.18948500 | -2.22523800 | 0.88160800  |
| H | -1.71762800 | -2.23153500 | 0.00000000  |
| H | -0.18948500 | -2.22523800 | -0.88160800 |

i-C<sub>4</sub>H<sub>9</sub>

|   |             |             |            |
|---|-------------|-------------|------------|
| C | -1.26843500 | -0.67952600 | 0.10135900 |
|---|-------------|-------------|------------|

|   |             |             |             |
|---|-------------|-------------|-------------|
| H | -2.16742100 | -0.16524800 | -0.24477000 |
| H | -1.28901100 | -1.69649000 | -0.29605800 |
| H | -1.31588900 | -0.74121800 | 1.19135100  |
| C | 0.00003500  | 0.05972100  | -0.34545900 |
| H | 0.00004800  | 0.05296400  | -1.45014300 |
| C | -0.00036600 | 1.48021100  | 0.10114400  |
| H | 0.92598100  | 2.03149600  | 0.19905300  |
| H | -0.92702600 | 2.03091300  | 0.19928500  |
| C | 1.26874400  | -0.67898200 | 0.10139700  |
| H | 1.28985500  | -1.69583200 | -0.29628200 |
| H | 2.16755500  | -0.16420700 | -0.24445500 |
| H | 1.31603700  | -0.74091700 | 1.19137400  |

t-C<sub>4</sub>H<sub>9</sub>

|   |             |             |             |
|---|-------------|-------------|-------------|
| C | 0.00000000  | 1.48206500  | -0.01471200 |
| H | -0.88571200 | 1.94041200  | 0.43273100  |
| H | 0.88571200  | 1.94041200  | 0.43273100  |
| H | 0.00000000  | 1.77662900  | -1.07823500 |
| C | 0.00000000  | 0.00000000  | 0.15052200  |
| C | 1.28350600  | -0.74103300 | -0.01471200 |
| H | 2.12330200  | -0.20315700 | 0.43273100  |
| H | 1.23759000  | -1.73725500 | 0.43273100  |
| H | 1.53860600  | -0.88831400 | -1.07823500 |
| C | -1.28350600 | -0.74103300 | -0.01471200 |
| H | -1.23759000 | -1.73725500 | 0.43273100  |
| H | -2.12330200 | -0.20315700 | 0.43273100  |
| H | -1.53860600 | -0.88831400 | -1.07823500 |

i-C<sub>4</sub>H<sub>10</sub>

|   |             |             |             |
|---|-------------|-------------|-------------|
| C | 0.00000000  | 1.45821400  | -0.09535400 |
| H | 0.88286800  | 1.99110500  | 0.26538800  |
| H | 0.00000000  | 1.51728100  | -1.18789400 |
| H | -0.88286800 | 1.99110500  | 0.26538800  |
| C | 0.00000000  | 0.00000000  | 0.37015700  |
| H | 0.00000000  | 0.00000000  | 1.46678200  |
| C | 1.26285000  | -0.72910700 | -0.09535400 |
| H | 2.16578100  | -0.23096700 | 0.26538800  |
| H | 1.28291400  | -1.76013800 | 0.26538800  |
| H | 1.31400400  | -0.75864000 | -1.18789400 |
| C | -1.26285000 | -0.72910700 | -0.09535400 |
| H | -1.28291400 | -1.76013800 | 0.26538800  |
| H | -2.16578100 | -0.23096700 | 0.26538800  |
| H | -1.31400400 | -0.75864000 | -1.18789400 |

## TS1

|   |             |             |             |
|---|-------------|-------------|-------------|
| C | 0.00000000  | 0.00000000  | 0.00000000  |
| H | 0.00000000  | 0.00000000  | 1.08420300  |
| H | 0.97686500  | 0.00000000  | -0.47011200 |
| H | -0.75321000 | -0.62092600 | -0.47218500 |
| H | -0.51967100 | 1.29788500  | -0.29975700 |
| O | -0.92764200 | 2.31825300  | -0.53227100 |
| O | -1.56296700 | 2.18178200  | -1.78773700 |
| H | -0.89683000 | 2.53478699  | -2.39742500 |

## TS2

|   |             |             |             |
|---|-------------|-------------|-------------|
| O | 1.69844100  | -0.64031900 | 0.12105500  |
| H | 2.12750400  | -0.41205800 | 0.96000400  |
| O | 1.26526800  | 0.61922800  | -0.35225100 |
| H | 0.14654700  | 0.67808200  | -0.06462300 |
| C | -1.19986400 | 0.70016600  | 0.26838400  |
| H | -1.15501000 | 0.88975100  | 1.33893400  |
| H | -1.53275700 | 1.56420200  | -0.30290800 |
| C | -1.73792400 | -0.63332100 | -0.15252600 |
| H | -2.79742000 | -0.72605200 | 0.12066800  |
| H | -1.66593000 | -0.77364000 | -1.23186400 |
| H | -1.20586700 | -1.45262500 | 0.33421100  |

## TS3

|   |             |             |             |
|---|-------------|-------------|-------------|
| O | 0.00000000  | 0.00000000  | 0.00000000  |
| O | 0.00000000  | 0.00000000  | 1.41424700  |
| H | 0.94668100  | 0.00000000  | 1.62345400  |
| H | -0.15631200 | -1.10856400 | -0.29750600 |
| C | -0.36871600 | -2.44652500 | -0.59744500 |
| H | 0.60206900  | -2.87337599 | -0.35279700 |
| H | -0.55336100 | -2.39078000 | -1.66945700 |
| C | -1.52337700 | -2.87418100 | 0.26035500  |
| H | -1.61733900 | -3.96867900 | 0.19049800  |
| H | -1.29243000 | -2.66849100 | 1.31028400  |
| C | -2.85222400 | -2.22364000 | -0.12047100 |
| H | -3.66021800 | -2.57874300 | 0.52116300  |
| H | -2.79574000 | -1.13838799 | -0.02301300 |
| H | -3.12013500 | -2.45456300 | -1.15438900 |

## TS4

|   |             |             |             |
|---|-------------|-------------|-------------|
| O | -1.52498300 | -0.32545600 | 0.68315900  |
| O | -2.00186900 | 0.01944600  | -0.60107300 |
| H | -2.30171200 | 0.93282100  | -0.47526600 |
| H | -0.35140300 | -0.18531000 | 0.61978300  |

|   |            |             |             |
|---|------------|-------------|-------------|
| C | 0.98897200 | -0.00911900 | 0.48838300  |
| H | 1.28260500 | -0.07096300 | 1.53757300  |
| C | 1.43329600 | -1.17844200 | -0.34682700 |
| H | 2.51781400 | -1.14168500 | -0.51508700 |
| H | 1.20736000 | -2.12941000 | 0.13677000  |
| H | 0.95177800 | -1.17012900 | -1.32719500 |
| C | 1.13588200 | 1.36253800  | -0.11072900 |
| H | 0.72756900 | 2.13665500  | 0.54106300  |
| H | 2.19463800 | 1.60037600  | -0.27810000 |
| H | 0.63726600 | 1.42586800  | -1.08119600 |

TS5

|   |             |             |             |
|---|-------------|-------------|-------------|
| O | 0.00000000  | 0.00000000  | 0.00000000  |
| O | 0.00000000  | 0.00000000  | 1.41416700  |
| H | 0.94663100  | 0.00000000  | 1.62358300  |
| H | -0.15900800 | -1.10943800 | -0.29734300 |
| C | -0.37698100 | -2.44675100 | -0.59251700 |
| H | 0.60721100  | -2.86806900 | -0.39709600 |
| H | -0.61317800 | -2.38836100 | -1.65414800 |
| C | -1.48526300 | -2.88591100 | 0.31827800  |
| H | -1.57577900 | -3.98198500 | 0.25338300  |
| H | -1.20790000 | -2.67902200 | 1.35783300  |
| C | -2.84165901 | -2.25009300 | 0.00795400  |
| H | -2.74410101 | -1.16296100 | 0.06697800  |
| H | -3.11527501 | -2.47928500 | -1.02747300 |
| C | -3.94992800 | -2.72039600 | 0.94661400  |
| H | -3.71839300 | -2.47124100 | 1.98506300  |
| H | -4.90380301 | -2.25122900 | 0.69892700  |
| H | -4.08791200 | -3.80331799 | 0.88865100  |

TS6

|   |             |             |             |
|---|-------------|-------------|-------------|
| C | -1.88390100 | -1.35595900 | 0.11068100  |
| H | -2.48940600 | -1.16945300 | 1.00063200  |
| H | -1.05297900 | -1.99913100 | 0.40724600  |
| H | -2.50101400 | -1.90700500 | -0.60101800 |
| C | -1.37943600 | -0.04711900 | -0.49472500 |
| H | -0.82678500 | -0.24535000 | -1.42007700 |
| H | -2.23917200 | 0.56831500  | -0.79965900 |
| C | -0.51647900 | 0.77073200  | 0.43106700  |
| H | -0.89018900 | 0.81843400  | 1.45650900  |
| C | 0.02318400  | 2.07337100  | -0.09228700 |
| H | -0.79556000 | 2.77561000  | -0.29718400 |
| H | 0.69345500  | 2.54875400  | 0.62452100  |
| H | 0.57027100  | 1.92858700  | -1.02638200 |

|   |            |             |             |
|---|------------|-------------|-------------|
| H | 0.59750100 | 0.01840200  | 0.62879800  |
| O | 1.58736600 | -0.62688300 | 0.72869200  |
| O | 2.11795600 | -0.67727100 | -0.58018700 |
| H | 1.83109000 | -1.55007500 | -0.88984500 |

TS7

|   |             |             |             |
|---|-------------|-------------|-------------|
| O | -2.43382600 | 0.05546200  | -0.81525900 |
| H | -2.92715300 | -0.76861000 | -0.94722300 |
| O | -2.17485900 | 0.03622200  | 0.57529900  |
| H | -1.09615800 | -0.36650400 | 0.67105200  |
| C | 0.21000900  | -0.83926000 | 0.74048500  |
| H | 0.43217300  | -0.68662900 | 1.79651600  |
| H | 0.06729100  | -1.88753300 | 0.48235800  |
| C | 1.00399700  | -0.01399100 | -0.23623500 |
| H | 0.49676400  | -0.06117800 | -1.20661700 |
| C | 2.40905800  | -0.62188400 | -0.42313200 |
| H | 2.35528600  | -1.65625300 | -0.76778100 |
| H | 2.97415300  | -0.04804000 | -1.16145000 |
| H | 2.96816600  | -0.60678400 | 0.51558700  |
| C | 1.08734100  | 1.45318800  | 0.19107000  |
| H | 1.63736000  | 2.04268200  | -0.54505700 |
| H | 0.09330900  | 1.88849800  | 0.29975000  |
| H | 1.60585500  | 1.54855900  | 1.14942100  |

TS8

|   |             |             |             |
|---|-------------|-------------|-------------|
| C | -0.74205700 | -1.11353600 | -1.06318100 |
| H | -0.53604500 | -0.69499000 | -2.05030800 |
| H | -1.70996100 | -1.62914000 | -1.12202800 |
| H | 0.01320400  | -1.87011600 | -0.84091800 |
| C | -0.78034700 | -0.04133000 | 0.00031500  |
| C | -1.64229900 | 1.15579400  | -0.32730900 |
| H | -2.70336400 | 0.87231700  | -0.32831400 |
| H | -1.51849900 | 1.95224400  | 0.40858600  |
| H | -1.41177300 | 1.56043000  | -1.31449500 |
| C | -0.90597700 | -0.55572500 | 1.41512100  |
| H | -0.14110500 | -1.30152700 | 1.63797500  |
| H | -0.81943900 | 0.25148800  | 2.14401800  |
| H | -1.88503600 | -1.03154500 | 1.56143600  |
| H | 0.45915300  | 0.45650500  | -0.02206600 |
| O | 1.58503700  | 0.89017700  | -0.04437300 |
| O | 2.41507900  | -0.23964000 | 0.11591500  |
| H | 2.67602000  | -0.44118000 | -0.79590300 |



2. Single point energies, correlation energies of reactants, products and transition states for the RH+HO<sub>2</sub> reactions with different methods.

Table S1 HF energies, CCSD-F12b and (T) correlation energies and CCSD(T)-F12b/CBS energies of for all reactants, products and transition states. (unit: Hartree.)

|         | HF          |             |             | $\Delta E_{(\text{CCSD-F12b})}$ |             | $\Delta E_{(\text{T})}$ |             | CCSD(T)-F12b |
|---------|-------------|-------------|-------------|---------------------------------|-------------|-------------------------|-------------|--------------|
|         | aug-cc-pVTZ | aug-cc-pVQZ | aug-cc-pV5Z | cc-pVDZ-F12                     | cc-pVTZ-F12 | cc-pVDZ-F12             | cc-pVTZ-F12 | CBS          |
| H2O2    | -150.837096 | -150.847029 | -150.849540 | -0.544499                       | -0.556980   | -0.020203               | -0.022417   | -151.435800  |
| CH4     | -40.213575  | -40.216198  | -40.216903  | -0.228416                       | -0.231410   | -0.006473               | -0.007126   | -40.457204   |
| C2H6    | -79.260216  | -79.265129  | -79.266365  | -0.420721                       | -0.426338   | -0.013952               | -0.015217   | -79.711184   |
| n-C3H8  | -118.308309 | -118.315510 | -118.317267 | -0.614562                       | -0.622823   | -0.021812               | -0.023696   | -118.968556  |
| p-C4H10 | -157.356267 | -157.365757 | -157.368035 | -0.808601                       | -0.819500   | -0.029744               | -0.032239   | -158.226043  |
| i-C4H10 | -157.356764 | -157.366260 | -157.368529 | -0.810084                       | -0.821001   | -0.030063               | -0.032574   | -158.228382  |
| HO2     | -150.232516 | -150.242459 | -150.244922 | -0.503603                       | -0.515702   | -0.018887               | -0.020903   | -150.788099  |
| CH3     | -39.573423  | -39.575816  | -39.576435  | -0.191614                       | -0.194561   | -0.004948               | -0.005540   | -39.778208   |
| C2H5    | -78.623591  | -78.628315  | -78.629471  | -0.385742                       | -0.391279   | -0.012612               | -0.013825   | -79.037739   |
| n-C3H7  | -117.671450 | -117.678459 | -117.680136 | -0.579480                       | -0.587640   | -0.020459               | -0.022286   | -118.294723  |
| i-C3H7  | -117.674872 | -117.681914 | -117.683599 | -0.580521                       | -0.588661   | -0.020535               | -0.022369   | -118.299288  |
| p-C4H9  | -156.719456 | -156.728751 | -156.730949 | -0.773517                       | -0.784310   | -0.028389               | -0.030826   | -157.552244  |
| s-C4H9  | -156.722718 | -156.732041 | -156.734248 | -0.774410                       | -0.785165   | -0.028443               | -0.030883   | -157.556445  |
| i-C4H9  | -156.719702 | -156.729003 | -156.731193 | -0.774820                       | -0.785598   | -0.028713               | -0.031155   | -157.554095  |
| t-C4H9  | -156.726589 | -156.735941 | -156.738148 | -0.775847                       | -0.786589   | -0.028746               | -0.031191   | -157.562071  |
| TS1     | -190.376913 | -190.388946 | -190.391973 | -0.755800                       | -0.771403   | -0.028801               | -0.031690   | -191.203665  |
| TS2     | -229.424055 | -229.438318 | -229.441859 | -0.952923                       | -0.971146   | -0.037339               | -0.040808   | -230.463887  |
| TS3     | -268.472099 | -268.488612 | -268.492660 | -1.147458                       | -1.168315   | -0.045420               | -0.049488   | -269.722023  |
| TS4     | -268.473249 | -268.489744 | -268.493793 | -1.149856                       | -1.170711   | -0.045945               | -0.050001   | -269.726059  |
| TS5     | -307.519998 | -307.538790 | -307.543355 | -1.341698                       | -1.365189   | -0.053424               | -0.058092   | -308.979686  |
| TS6     | -307.520852 | -307.539598 | -307.544154 | -1.344637                       | -1.368129   | -0.054101               | -0.058757   | -308.984080  |
| TS7     | -307.520468 | -307.539262 | -307.543819 | -1.342758                       | -1.366266   | -0.053796               | -0.058466   | -308.981602  |
| TS8     | -307.523010 | -307.541754 | -307.546305 | -1.347270                       | -1.370749   | -0.054702               | -0.059348   | -308.989428  |

Table S2 Single point energies obtained by CCSD-F12x (x=a,b), DLPNO-CC and FN-DMC methods for all reactants, products and transition states. (unit: Hartree.)

| system                           | CCSD(T)-F12b |             | CCSD(T)-F12a |             | DLPNO-CCSD(T) | DLPNO-CCSD(T1) | DLPNO-CCSD(T)-F12 |             | FN-DMC        |
|----------------------------------|--------------|-------------|--------------|-------------|---------------|----------------|-------------------|-------------|---------------|
|                                  | cc-pVDZ-F12  | cc-pVTZ-F12 | cc-pVDZ-F12  | cc-pVTZ-F12 | aug-cc-pVQZ   |                | cc-pVTZ-F12       | cc-pVQZ-F12 | BFD-PP        |
| H <sub>2</sub> O <sub>2</sub>    | -151.403607  | -151.427027 | -151.411938  | -151.434884 | -151.411879   | -151.412742    | -151.420548       | -151.429316 | -33.20275(30) |
| CH <sub>4</sub>                  | -40.449018   | -40.454907  | -40.453028   | -40.458436  | -40.451793    | -40.451930     | -40.453252        | -40.455678  | -8.09421(14)  |
| C <sub>2</sub> H <sub>6</sub>    | -79.695956   | -79.706988  | -79.702932   | -79.713330  | -79.700444    | -79.700781     | -79.703657        | -79.708141  | -14.98482(24) |
| n-C <sub>3</sub> H <sub>8</sub>  | -118.946282  | -118.962459 | -118.956190  | -118.971599 | -118.952469   | -118.953033    | -118.957439       | -118.963901 | -21.87852(30) |
| p-C <sub>4</sub> H <sub>10</sub> | -158.196743  | -158.218050 | -158.209579  | -158.229985 | -158.204628   | -158.205424    | -158.211292       | -158.219759 | -28.77233(38) |
| i-C <sub>4</sub> H <sub>10</sub> | -158.199072  | -158.220383 | -158.211892  | -158.232302 | -158.206937   | -158.207754    | -158.213609       | -158.222081 | -28.77419(36) |
| HO <sub>2</sub>                  | -150.757041  | -150.779697 | -150.764569  | -150.786926 | -150.764278   | -150.765077    | -150.774545       | -150.782456 | -32.55458(30) |
| CH <sub>3</sub>                  | -39.770469   | -39.776062  | -39.774038   | -39.779084  | -39.773211    | -39.773270     | -39.775063        | -39.777015  | -7.41437(15)  |
| C <sub>2</sub> H <sub>5</sub>    | -79.022948   | -79.033698  | -79.029409   | -79.039532  | -79.027235    | -79.027488     | -79.031120        | -79.035029  | -14.30940(23) |
| n-C <sub>3</sub> H <sub>7</sub>  | -118.272916  | -118.288789 | -118.282310  | -118.297426 | -118.278734   | -118.279203    | -118.284528       | -118.290355 | -21.20304(31) |
| i-C <sub>3</sub> H <sub>7</sub>  | -118.277457  | -118.293353 | -118.286796  | -118.301984 | -118.283197   | -118.283662    | -118.289159       | -118.294957 | -21.20770(29) |
| p-C <sub>4</sub> H <sub>9</sub>  | -157.523415  | -157.544415 | -157.535736  | -157.555846 | -157.530807   | -157.531494    | -157.538508       | -157.546239 | -28.09684(35) |
| s-C <sub>4</sub> H <sub>9</sub>  | -157.527620  | -157.548623 | -157.539889  | -157.560053 | -157.534877   | -157.535559    | -157.542752       | -157.550495 | -157.524269   |
| i-C <sub>4</sub> H <sub>9</sub>  | -157.525319  | -157.546280 | -157.537627  | -157.557704 | -157.532570   | -157.533274    | -157.540337       | -157.548065 | -28.09887(37) |
| t-C <sub>4</sub> H <sub>9</sub>  | -157.533261  | -157.554259 | -157.545456  | -157.565667 | -157.540405   | -157.541099    | -157.548391       | -157.556159 | -28.10692(33) |
| TS1                              | -191.163572  | -191.192725 | -191.175459  | -191.203750 | -191.173830   | -191.174895    | -191.185318       | -191.195917 | -40.60621(37) |
| TS2                              | -230.416837  | -230.451081 | -230.431566  | -230.464924 | -230.428439   | -230.429734    | -230.442016       | -230.454515 | -47.50208(42) |
| TS3                              | -269.667992  | -269.707345 | -269.685634  | -269.723986 | -269.681082   | -269.682605    | -269.696592       | -269.710964 | -54.39672(48) |
| TS4                              | -269.672048  | -269.711386 | -269.689621  | -269.728023 | -269.685004   | -269.686545    | -269.700556       | -269.715016 | -54.40080(46) |
| TS5                              | -308.918656  | -308.963124 | -308.939217  | -308.982559 | -308.933310   | -308.935053    | -308.950676       | -308.966962 | -61.29076(53) |
| TS6                              | -308.923084  | -308.967529 | -308.943571  | -308.986963 | -308.937523   | -308.939290    | -308.954947       | -308.971332 | -308.922856   |
| TS7                              | -308.920581  | -308.965041 | -308.941127  | -308.984466 | -308.935113   | -308.936878    | -308.952533       | -308.968804 | -61.29180(58) |
| TS8                              | -308.928493  | -308.972895 | -308.948911  | -308.992305 | -308.942786   | -308.944582    | -308.960228       | -308.976647 | -61.30025(50) |

Table S3 Single point energies obtained by those dispersion-uncorrected and dispersion-corrected DFAs for all reactants, products and transition states. (unit: Hartree.)

| System                           | dispersion-uncorrected |             |             |             |             |             |             | dispersion-corrected |             |             |             |
|----------------------------------|------------------------|-------------|-------------|-------------|-------------|-------------|-------------|----------------------|-------------|-------------|-------------|
|                                  | B3LYP                  | M06-2X      | MN15        | B2GP-PLYP   | DSD-BLYP    | DSD-PBEP86  | DSD-PBEB95  | B3LYPG               | B2GP-PLYP   | DSD-PBEP86  | DSD-PBEB95  |
| H <sub>2</sub> O <sub>2</sub>    | -151.629362            | -151.563372 | -151.542586 | -151.513731 | -151.502176 | -151.427296 | -151.433033 | -151.630700          | -151.514088 | -151.415778 | -151.428831 |
| CH <sub>4</sub>                  | -40.542273             | -40.506158  | -40.494249  | -40.486079  | -40.480277  | -40.456956  | -40.453191  | -40.544187           | -40.486574  | -40.453291  | -40.452389  |
| C <sub>2</sub> H <sub>6</sub>    | -79.871907             | -79.814215  | -79.789390  | -79.770864  | -79.760716  | -79.714740  | -79.710193  | -79.877321           | -79.772384  | -79.707644  | -79.708745  |
| n-C <sub>3</sub> H <sub>8</sub>  | -119.203474            | -119.125316 | -119.087594 | -119.058483 | -119.044372 | -118.975650 | -118.970162 | -119.213389          | -119.061386 | -118.965287 | -118.968219 |
| p-C <sub>4</sub> H <sub>10</sub> | -158.534924            | -158.436428 | -158.385881 | -158.346100 | -158.328070 | -158.236603 | -158.230164 | -158.549507          | -158.350450 | -158.223004 | -158.227766 |
| i-C <sub>4</sub> H <sub>10</sub> | -158.535773            | -158.438555 | -158.388134 | -158.347911 | -158.330263 | -158.238730 | -158.232170 | -158.551259          | -158.352573 | -158.225285 | -158.229889 |
| HO <sub>2</sub>                  | -150.986302            | -150.919985 | -150.899077 | -150.870073 | -150.855833 | -150.781677 | -150.789320 | -150.987169          | -150.870313 | -150.770610 | -150.785805 |
| CH <sub>3</sub>                  | -39.862952             | -39.829469  | -39.817860  | -39.809728  | -39.803006  | -39.780582  | -39.776005  | -39.864339           | -39.810099  | -39.777226  | -39.775407  |
| C <sub>2</sub> H <sub>5</sub>    | -79.200038             | -79.143988  | -79.120204  | -79.100628  | -79.089365  | -79.044182  | -79.039127  | -79.204674           | -79.101969  | -79.037297  | -79.037874  |
| n-C <sub>3</sub> H <sub>7</sub>  | -118.531347            | -118.454723 | -118.418012 | -118.387847 | -118.372559 | -118.304647 | -118.298686 | -118.540364          | -118.390539 | -118.294496 | -118.296933 |
| i-C <sub>3</sub> H <sub>7</sub>  | -118.537628            | -118.459998 | -118.423881 | -118.393001 | -118.377530 | -118.309541 | -118.303819 | -118.546431          | -118.395647 | -118.299305 | -118.302066 |
| p-C <sub>4</sub> H <sub>9</sub>  | -157.862840            | -157.765936 | -157.716393 | -157.675502 | -157.656292 | -157.565641 | -157.558727 | -157.876528          | -157.679641 | -157.552252 | -157.556518 |
| s-C <sub>4</sub> H <sub>9</sub>  | -157.868862            | -157.770828 | -157.721798 | -157.680288 | -157.660839 | -157.570125 | -157.563473 | -157.882214          | -157.684351 | -157.556650 | -157.561258 |
| i-C <sub>4</sub> H <sub>9</sub>  | -157.863298            | -157.767583 | -157.717978 | -157.676795 | -157.657896 | -157.567196 | -157.560181 | -157.877741          | -157.681209 | -157.553963 | -157.558085 |
| t-C <sub>4</sub> H <sub>9</sub>  | -157.874706            | -157.776685 | -157.728139 | -157.685979 | -157.666672 | -157.575852 | -157.569335 | -157.888655          | -157.690284 | -157.562459 | -157.567247 |
| TS1                              | -191.488701            | -191.385226 | -191.350694 | -191.314156 | -191.295675 | -191.198376 | -191.199530 | -191.493522          | -191.315508 | -191.183803 | -191.195261 |
| TS2                              | -230.825017            | -230.699988 | -230.652622 | -230.605231 | -230.582490 | -230.462346 | -230.462847 | -230.834010          | -230.607845 | -230.444401 | -230.458053 |
| TS3                              | -270.156657            | -270.011754 | -269.951507 | -269.893288 | -269.866698 | -269.723796 | -269.723370 | -270.170628          | -269.897448 | -269.702681 | -269.718189 |
| TS4                              | -270.161412            | -270.016055 | -269.955809 | -269.897601 | -269.870989 | -269.727972 | -269.727587 | -270.175557          | -269.901824 | -269.706842 | -269.722425 |
| TS5                              | -309.488139            | -309.322985 | -309.249934 | -309.181012 | -309.150527 | -308.984866 | -308.983497 | -309.506916          | -309.186672 | -308.960548 | -308.977900 |
| TS6                              | -309.492611            | -309.327618 | -309.254633 | -309.185370 | -309.154964 | -308.989198 | -308.987859 | -309.511964          | -309.191223 | -308.964944 | -308.982365 |
| TS7                              | -309.488427            | -309.324536 | -309.251470 | -309.182336 | -309.152216 | -308.986488 | -308.984983 | -309.507982          | -309.188271 | -308.962307 | -308.979477 |
| TS8                              | -309.497421            | -309.332727 | -309.259629 | -309.190665 | -309.160541 | -308.994582 | -308.993163 | -309.517502          | -309.196785 | -308.970414 | -308.987742 |

3. Deviations of the barrier heights, reaction energies and X-H bond energies for DFA-D3(BJ) with respect to the CCSD(T)-F12b/CBS values and differences between barrier heights of R1-R8 reactions by those dispersion-corrected and dispersion-uncorrected DFAs.

Table S4 Deviations of the barrier heights for DFA-D3(BJ) with respect to the CCSD(T)-F12b/CBS values. (unit: kJ/mol)

| Reaction | Barrier        | B3LYP  | B2GP-PLYP | DSD-PBEP86 | DSD-PBEB95 |
|----------|----------------|--------|-----------|------------|------------|
| R1       | $V_f^\ddagger$ | -10.00 | -0.67     | -4.06      | 3.39       |
|          | $V_r^\ddagger$ | -23.18 | -4.35     | -3.01      | -3.60      |
| R2       | $V_f^\ddagger$ | -12.89 | -1.42     | -4.06      | 2.89       |
|          | $V_r^\ddagger$ | -21.76 | -3.81     | -2.59      | -2.64      |
| R3       | $V_f^\ddagger$ | -12.34 | -1.00     | -3.72      | 3.18       |
|          | $V_r^\ddagger$ | -21.17 | -3.47     | -2.38      | -2.43      |
| R4       | $V_f^\ddagger$ | -14.69 | -1.88     | -4.06      | 2.64       |
|          | $V_r^\ddagger$ | -19.58 | -2.97     | -2.09      | -1.46      |
| R5       | $V_f^\ddagger$ | -12.34 | -0.96     | -3.64      | 3.18       |
|          | $V_r^\ddagger$ | -21.09 | -3.39     | -2.26      | -2.38      |
| R6       | $V_f^\ddagger$ | -14.02 | -1.34     | -3.64      | 3.01       |
|          | $V_r^\ddagger$ | -18.91 | -2.47     | -1.76      | -1.13      |
| R7       | $V_f^\ddagger$ | -11.63 | -0.71     | -3.39      | 3.51       |
|          | $V_r^\ddagger$ | -20.54 | -3.31     | -2.26      | -2.22      |
| R8       | $V_f^\ddagger$ | -16.11 | -2.51     | -4.14      | 2.34       |
|          | $V_r^\ddagger$ | -17.32 | -2.26     | -1.63      | -0.29      |
| MD       |                | -16.72 | -2.28     | -3.04      | 0.50       |
| MAD      |                | 16.72  | 2.28      | 3.04       | 2.52       |

Table S5 Differences between barrier heights of R1-R8 reactions by those dispersion-corrected and dispersion-uncorrected DFAs. (unit: kJ/mol)

| Reaction | Barrier        | B3LYP  | B2GP-PLYP | DSD-PBEP86 | DSD-PBEB95 |
|----------|----------------|--------|-----------|------------|------------|
| R1       | $V_f^\ddagger$ | -5.36  | -1.59     | -0.42      | -0.12      |
|          | $V_r^\ddagger$ | -5.52  | -1.63     | -0.79      | -1.42      |
| R2       | $V_f^\ddagger$ | -7.12  | -2.26     | -0.59      | -0.46      |
|          | $V_r^\ddagger$ | -7.91  | -2.43     | -1.21      | -1.72      |
| R3       | $V_f^\ddagger$ | -8.37  | -2.67     | -0.83      | -0.71      |
|          | $V_r^\ddagger$ | -9.50  | -2.93     | -1.46      | -2.05      |
| R4       | $V_f^\ddagger$ | -8.83  | -2.80     | -0.80      | -0.75      |
|          | $V_r^\ddagger$ | -10.50 | -3.22     | -1.63      | -2.05      |
| R5       | $V_f^\ddagger$ | -8.74  | -2.80     | -0.92      | -0.84      |
|          | $V_r^\ddagger$ | -9.84  | -3.06     | -1.51      | -2.17      |
| R6       | $V_f^\ddagger$ | -10.25 | -3.31     | -1.09      | -1.13      |
|          | $V_r^\ddagger$ | -12.22 | -3.77     | -1.93      | -2.43      |
| R7       | $V_f^\ddagger$ | -8.37  | -2.72     | -0.84      | -0.76      |
|          | $V_r^\ddagger$ | -9.91  | -3.06     | -1.51      | -2.09      |
| R8       | $V_f^\ddagger$ | -9.79  | -3.18     | -0.92      | -1.01      |
|          | $V_r^\ddagger$ | -12.59 | -3.85     | -1.96      | -2.30      |

Table S6 Deviations of the reaction energies for DFA-D3(BJ) with respect to the CCSD(T)-F12b/CBS results.  
(unit: kJ/mol)

| Reaction | B3LYP | B2GP-PLYP | DSD-PBEP86 | DSD-PBEB95 |
|----------|-------|-----------|------------|------------|
| R1       | 13.18 | 3.68      | -1.05      | 6.99       |
| R2       | 8.87  | 2.38      | -1.46      | 5.52       |
| R3       | 8.83  | 2.47      | -1.34      | 5.61       |
| R4       | 4.90  | 1.09      | -1.97      | 4.10       |
| R5       | 8.74  | 2.43      | -1.38      | 5.56       |
| R6       | 4.90  | 1.13      | -1.88      | 4.14       |
| R7       | 8.91  | 2.59      | -1.13      | 5.73       |
| R8       | 1.21  | -0.25     | -2.51      | 2.64       |
| MAD      | 7.44  | 2.00      | 1.59       | 5.04       |

Table S7 Deviations of the X-H bond energies for DFA-D3(BJ) with respect to the CCSD(T)-F12b/CBS results.  
(unit: kJ/mol)

| Dissociation system                                                          | B3LYP  | B2GP-PLYP | DSD-PBEP86 | DSD-PBEB95 |
|------------------------------------------------------------------------------|--------|-----------|------------|------------|
| 1. $\text{H}_2\text{O}_2 \rightarrow \text{HO}_2 + \text{H}$                 | -17.25 | -7.91     | -4.22      | -6.59      |
| 2. $\text{CH}_4 \rightarrow \text{CH}_3 + \text{H}$                          | -4.08  | -4.23     | -5.28      | 0.38       |
| 3. $\text{C}_2\text{H}_6 \rightarrow \text{C}_2\text{H}_5 + \text{H}$        | -8.42  | -5.58     | -5.74      | -1.10      |
| 4. $\text{n-C}_3\text{H}_8 \rightarrow \text{n-C}_3\text{H}_7 + \text{H}$    | -8.43  | -5.45     | -5.57      | -1.02      |
| 5. $\text{n-C}_3\text{H}_8 \rightarrow \text{i-C}_3\text{H}_7 + \text{H}$    | -12.39 | -6.89     | -6.23      | -2.52      |
| 6. $\text{p-C}_4\text{H}_{10} \rightarrow \text{p-C}_4\text{H}_9 + \text{H}$ | -8.47  | -5.47     | -5.59      | -1.04      |
| 7. $\text{p-C}_4\text{H}_{10} \rightarrow \text{s-C}_4\text{H}_9 + \text{H}$ | -12.35 | -6.79     | -6.09      | -2.43      |
| 8. $\text{i-C}_4\text{H}_{10} \rightarrow \text{i-C}_4\text{H}_9 + \text{H}$ | -8.35  | -5.30     | -5.39      | -0.87      |
| 9. $\text{i-C}_4\text{H}_{10} \rightarrow \text{t-C}_4\text{H}_9 + \text{H}$ | -16.04 | -8.17     | -6.73      | -3.96      |
| MAD                                                                          | 10.64  | 6.20      | 5.65       | 2.21       |
